# Supplementary material
Source: MDPI journal article supplement (https://www.mdpi.com/2312-7481/8/10/112)
Supplement: s1 [file s1]

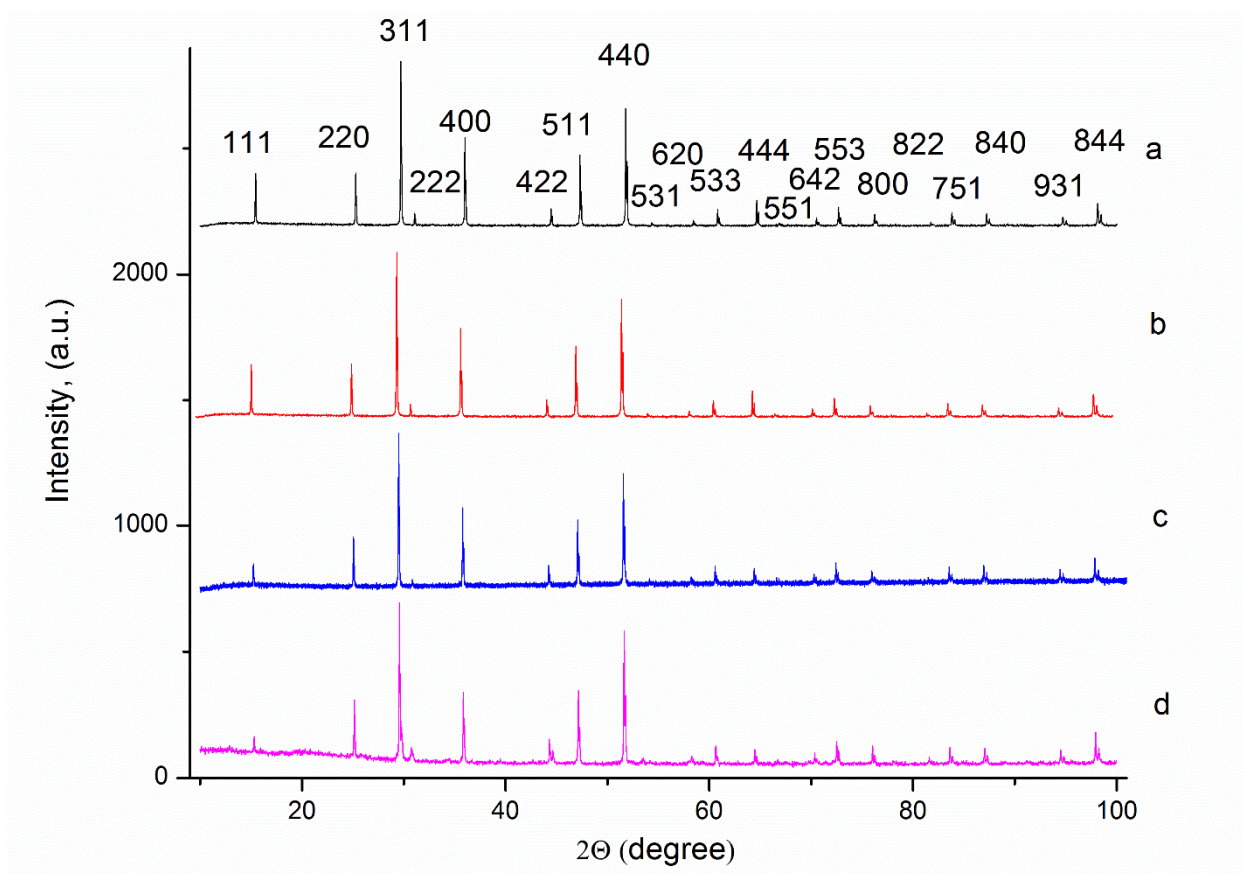

**Figure S1.** X-ray diffraction patterns for  $\text{Fe}_{1-x}\text{Ag}_x\text{Cr}_2\text{S}_4$  samples:  $x=0.05$  (a),  $x=0.1$  (b),  $x=0.15$  (c),  $x=0.2$  (d).

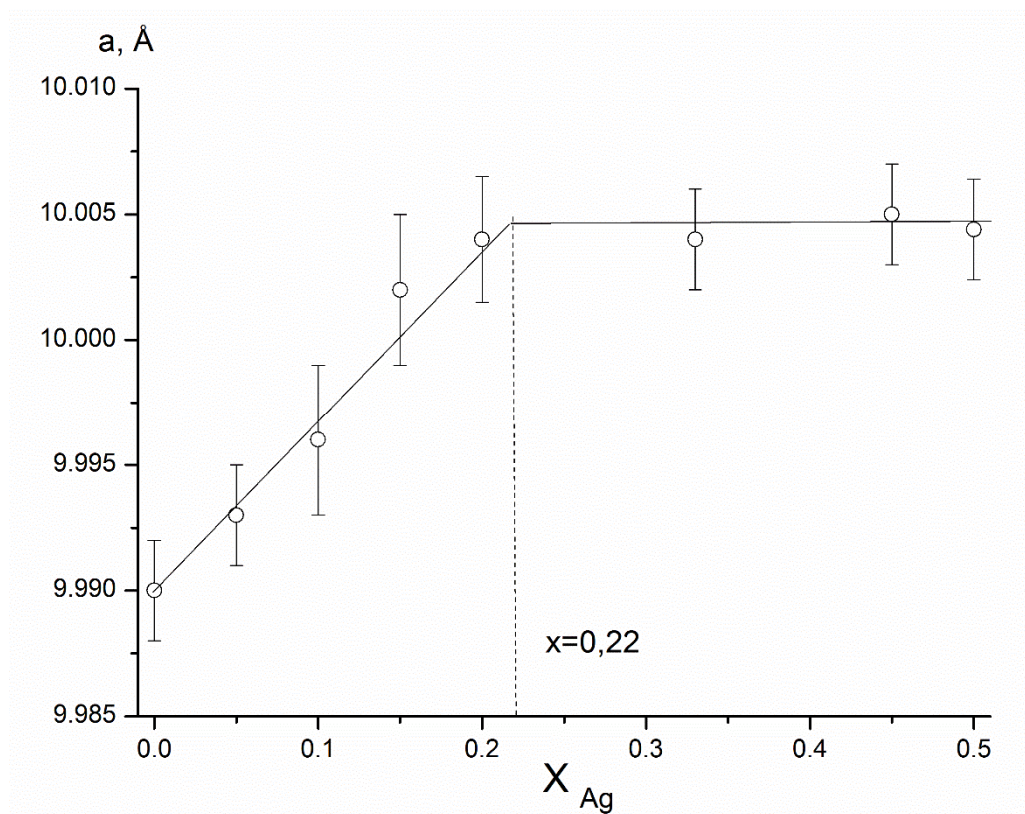

**Figure S2.** Dependence of the parameter  $a$  of the crystal lattice on the content of Ag.
